# Supplementary material for: Spectral characterisation of a traditional Mesoamerican dye: relationship between in situ identification on the 16th century Codex Borbonicus manuscript and composition of Justicia spicigera plant extract
Source: Royal Society of Chemistry journal article supplement (doi:10.1039/d1an00113b), 2021-01-01
Supplement: d1an00113b1.pdf [file d1an00113b1.pdf]

## Supplementary material

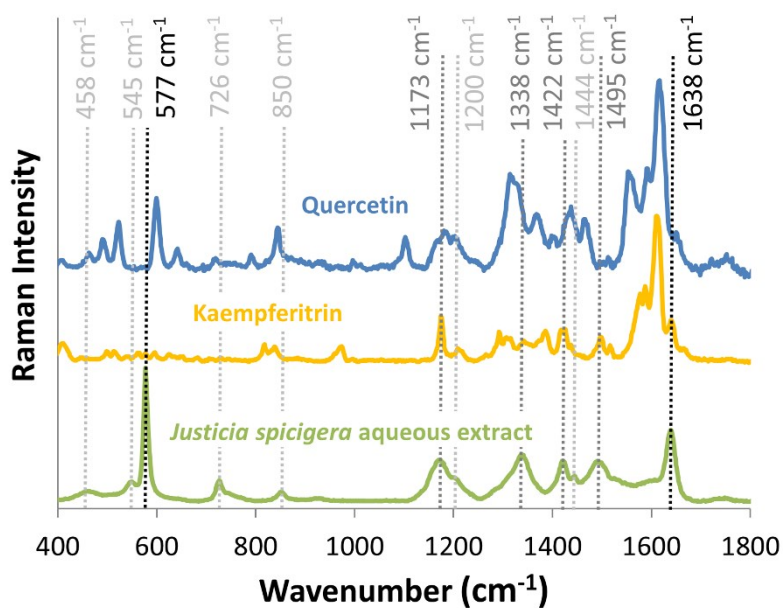

Figure S1. Conventional Raman spectra (532 nm) of the aqueous extract of *Justicia spicigera* leaves and of kaempferitrin and quercetin analytical grade molecules from Interchim (Montluçon, France)
